# Supplementary material for: Superior sodium storage performance of reduced graphene oxide-supported Na3.12Fe2.44(P2O7)2/C nanocomposites
Source: Royal Society of Chemistry journal article supplement (doi:10.1039/c7cc01812f), 2017-01-01
Supplement: c7cc01812f1.pdf [file c7cc01812f1.pdf]

**Electronic Supplementary Information (ESI)**

**Superior sodium storage performance of reduced graphene oxide-supported  $\text{Na}_{3.12}\text{Fe}_{2.44}(\text{P}_2\text{O}_7)_2/\text{C}$  nanocomposite**

Hee Jo Song,<sup>a,b</sup> Kyeong-Ho Kim,<sup>a</sup> Jae-Chan Kim,<sup>b</sup> Seong-Hyeon Hong<sup>a</sup> and Dong-Wan Kim<sup>\*b</sup>

<sup>a</sup> Department of Materials Science and Engineering, Seoul National University, Seoul 151-744, Republic of Korea

<sup>b</sup> School of Civil, Environmental and Architectural Engineering, Korea University, Seoul 136-713, Republic of Korea

**Corresponding Author**

\* E-mail: [dwkim1@korea.ac.kr](mailto:dwkim1@korea.ac.kr) (D.W. Kim)

## Experimental procedures

*Synthesis of NFP-NPs/C/rGO.* All the chemicals used were reagent grade and employed without further purification. As mentioned above, NFP-NPs/C/rGO was synthesized by the sol-gel method; citric acid was used as the chelating agent as well as the carbon source. In a typical synthesis process, 8 g of a GO solution (2 wt% GO dispersion in water, Angstrom Materials) was mixed with 42 ml of deionized water (total 50 ml). Next, 6.1 mmol of  $\text{Fe}(\text{CH}_3\text{COO})_2$  (Fe 29.5%, Alfa Aesar) and 15 mmol of citric acid (CA; 99.5%, Sigma-Aldrich) were dissolved in the aqueous GO dispersion. Then, 7.8 mmol of  $\text{Na}(\text{CH}_3\text{COO})$  (99%, Sigma-Aldrich) and 10 mmol of  $\text{NH}_4\text{H}_2\text{PO}_4$  (98%, Sigma-Aldrich) were dissolved in another 50 ml of distilled water. The molar ratios of the Na/Fe/P/C sources were 3.12:2.44:4:6. The two solutions were then mixed in a three-neck round-bottom flask and refluxed at 80 °C for 12 h under magnetic stirring. After the reflux process, the solution was kept on a hotplate at 70 °C to evaporate the solvent. Next, the wet gel was completely dried in a vacuum oven. The resultant dried gel was then heat-treated in a tube furnace at 600 °C for 3 h in a flow of a 5%  $\text{H}_2/\text{Ar}$  balance gas. The product was ball-milled with  $\text{ZrO}_2$  balls and ethanol, dried and then heat-treated again under the same conditions. For comparison, NFP-NPs/C without rGO was also synthesized under the same conditions.

*Material characterization.* Transmission electron microscopy (TEM) imaging was performed using a JEOL JEM-2100F system. Field-emission scanning electron microscopy (FESEM) imaging was performed using a Hitachi SU-70 system. The X-ray diffraction (XRD) patterns of the powder samples were measured with a Bruker D8-Advance system using  $\text{Cu K}\alpha$  radiation; the measurements were performed for  $2\theta$  of 10–40°. The Na, Fe, and P concentrations in solutions of the samples in HCl were determined using inductively coupled

plasma-optical emission spectroscopy (ICP-OES; ICP-730 ES, Varian). X-ray photoelectron spectroscopy (XPS) was performed with a Thermo Scientific Sigma Probe using an Al K $\alpha$  X-ray source. The infrared (IR) spectra were measured in the range of 1400–400 cm<sup>-1</sup> using an FT-IR spectrometer (Hyperion 3000, Bruker). The Brunauer–Emmett–Teller (BET) specific surface areas and pore size distributions of the products were determined based on their nitrogen adsorption–desorption isotherms, which were measured at 77 K using a Micromeritics ASAP 2010 system. The carbon contents of the powders were measured by thermogravimetric analysis (TGA; DTG-60H, Shimadzu Co.) and using an elemental analyzer (Flash EA 1112, Thermo Electron Co.).

*Electrochemical measurements.* The electrochemical properties of the NFP-NPs/C and NFP-NPs/C/rGO samples were evaluated using 2032 coin-type half cells, which were fabricated in an Ar-filled glove box. The NFP-NPs/C and NFP-NPs/C/rGO working electrodes were prepared using 70 wt% active material, 15 wt% Super P carbon black (MMM Carbon, Belgium), and 15 wt% polyvinylidene fluoride as binder (Sigma-Aldrich); this mixture was cast onto a piece of Al foil. The mass loading rate of the active material on the Al foil was 2–3 mg cm<sup>-2</sup>. The cells were assembled using the working electrode, a glass microfiber separator film (diameter 47 mm, Whatman), and a piece of Na metal foil as the counter electrode. A liquid electrolyte consisting of 1 M NaClO<sub>4</sub> dissolved in a solution of ethylene carbonate and propylene carbonate in a volume ratio of 1:1 was used in the cells. These cells were galvanostatically cycled at voltages of 2.0–4.0 V (versus Na/Na<sup>+</sup>) using an automatic battery cycler (WBCS3000, WonATech, Korea). Cyclic voltammetry (CV) measurements were performed for the same voltage range at a scan rate of 0.05 mV s<sup>-1</sup>. Electrochemical impedance spectroscopy (EIS) measurements were performed in the frequency range of 100 kHz to 10 mHz at an AC amplitude of 10 mV; an Ivium-n-Stat (Ivium Technologies, Netherlands)

electrochemical test system was employed for the purpose.

**Table S1.** Na/Fe/P atomic ratios of NFP-NPs/C and NFP-NPs/C/rGO samples as determined by ICP-OES.

| Sample        | Element | No. of Moles | Atomic Ratio |
|---------------|---------|--------------|--------------|
| NFP-NPs/C     | Na      | 1.306        | 3.22         |
|               | Fe      | 0.984        | 2.43         |
|               | P       | 1.620        | 4.00         |
| NFP-NPs/C/rGO | Na      | 1.338        | 3.29         |
|               | Fe      | 0.969        | 2.39         |
|               | P       | 1.624        | 4.00         |

**Table S2.** Results of C elemental analyses of NFP-NPs/C and NFP-NPs/C/rGO.

| Sample        | C content (wt%) |
|---------------|-----------------|
| NFP-NPs/C     | 16.1            |
| NFP-NPs/C/rGO | 19.5            |

**Table S3.** Comparison of electrochemical performances of previously reported  $\text{Na}_2\text{FeP}_2\text{O}_7$ - and  $\text{Na}_{3.12}\text{Fe}_{2.44}(\text{P}_2\text{O}_7)_2$ -based cathodes for NIBs.

| <b>Material</b>                                            |                               | <b>Voltage<br/>(V)</b> | <b>Cycle<br/>(No.)</b> | <b>Rate<br/>(C)</b> | <b>Capacity<br/>(mA h g<sup>-1</sup>)</b> | <b>Ref.</b> |
|------------------------------------------------------------|-------------------------------|------------------------|------------------------|---------------------|-------------------------------------------|-------------|
| $\text{Na}_2\text{FeP}_2\text{O}_7$                        | Submicron                     | 2.0-4.0                | 10                     | 0.05                | 82                                        | [8]         |
| $\text{Na}_2\text{FeP}_2\text{O}_7$                        | Micro                         | 2.0-4.5                | 80                     | 0.05                | 92                                        | [20]        |
| $\text{Na}_2\text{FeP}_2\text{O}_7$                        | Micro                         | 2.0-3.8                | 50                     | 0.05                | 80                                        | [21]        |
| $\text{Na}_2\text{FeP}_2\text{O}_7$                        | CNT<br>composite              | 2.0-4.0                | 140                    | 1                   | 86                                        | [22]        |
| $\text{Na}_{3.12}\text{Fe}_{2.44}(\text{P}_2\text{O}_7)_2$ | Micro                         | 1.7-4.0                | 60                     | 0.05                | 80                                        | [9]         |
| $\text{Na}_{3.12}\text{Fe}_{2.44}(\text{P}_2\text{O}_7)_2$ | Graphene<br>composite         | 1.7-4.0                | 80                     | 0.2                 | 100                                       | [23]        |
| $\text{Na}_{3.12}\text{Fe}_{2.44}(\text{P}_2\text{O}_7)_2$ | CNT<br>composite              | 1.7-4.0                | 120                    | 0.15                | 100                                       | [24]        |
| $\text{Na}_{3.12}\text{Fe}_{2.44}(\text{P}_2\text{O}_7)_2$ | Coral-like                    | 2.0-4.0                | 200                    | 5                   | 80                                        | [15]        |
| $\text{Na}_{3.12}\text{Fe}_{2.44}(\text{P}_2\text{O}_7)_2$ | Hollow porous<br>microspheres | 1.5-4.0                | 500                    | 10                  | 60                                        | [25]        |

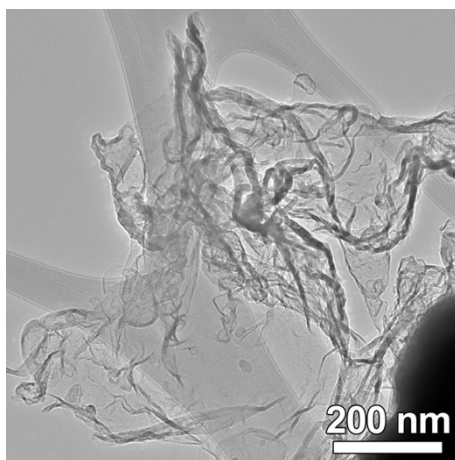

**Fig. S1** TEM image of GO.



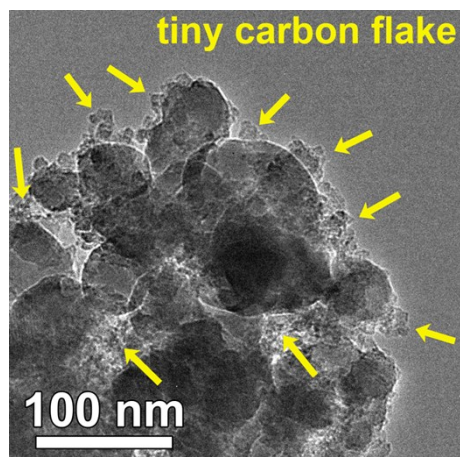

**Fig. S2** TEM image of NFP-NPs/C (without rGO).

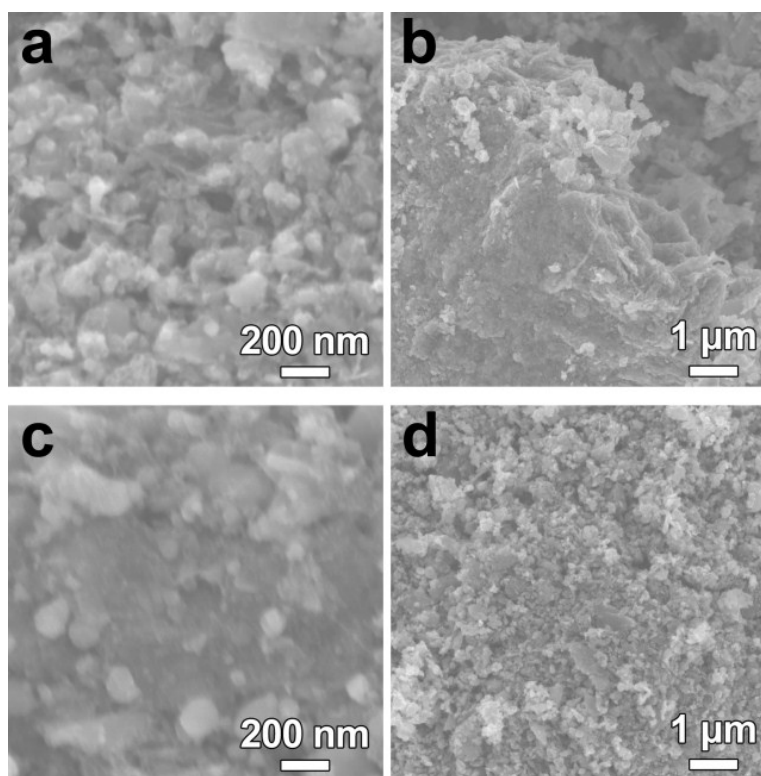

**Fig. S3** FESEM images of (a-b) NFP-NPs/C/rGO after first HT process and (c-d) after HT→BM →HT process.

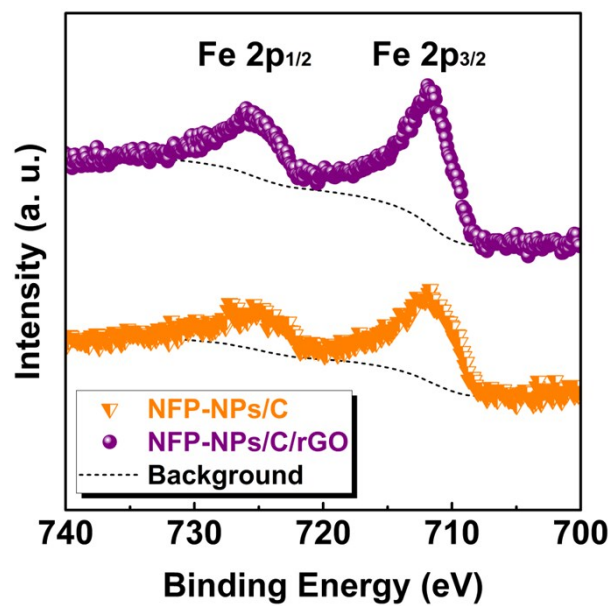

**Fig. S4** Fe 2p levels XPS spectra of NFP-NPs/C and NFP-NPs/C/rGO.

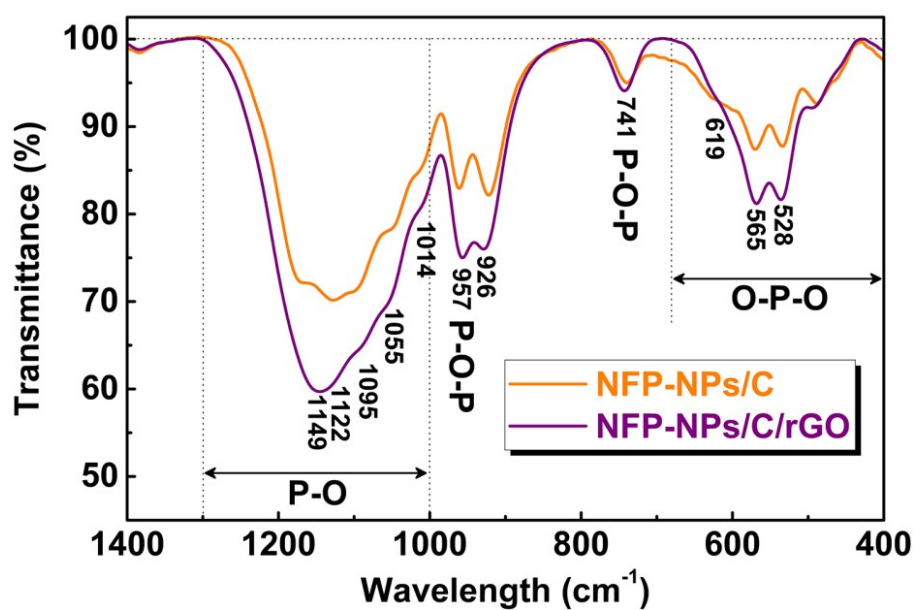

**Fig. S5** FT-IR spectra of NFP-NPs/C and NFP-NPs/C/rGO in the range of 1400-400 wavelength ( $\text{cm}^{-1}$ ).

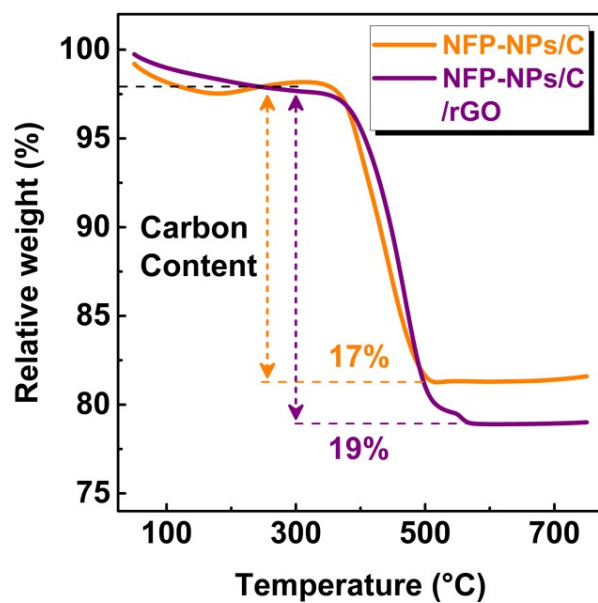

**Fig. S6** TGA curves of NFP-NPs/C and NFP-NPs/C/rGO.

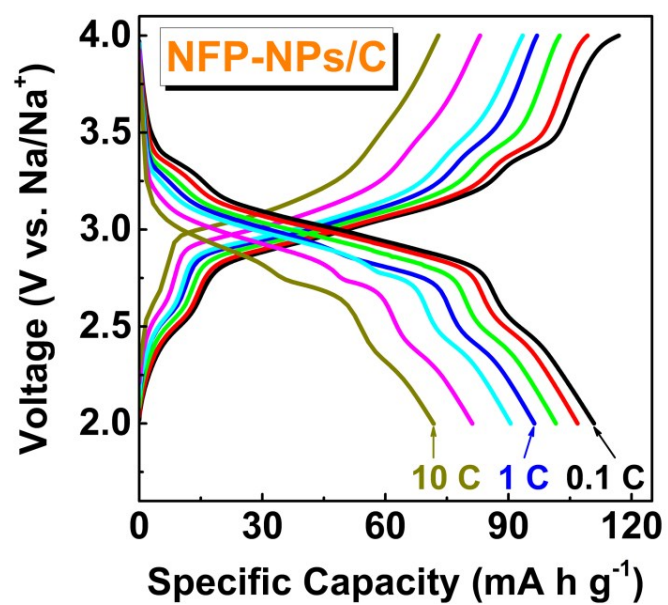

**Fig. S7** Galvanostatic voltage–capacity profiles of NFP-NPs/C at different rates.

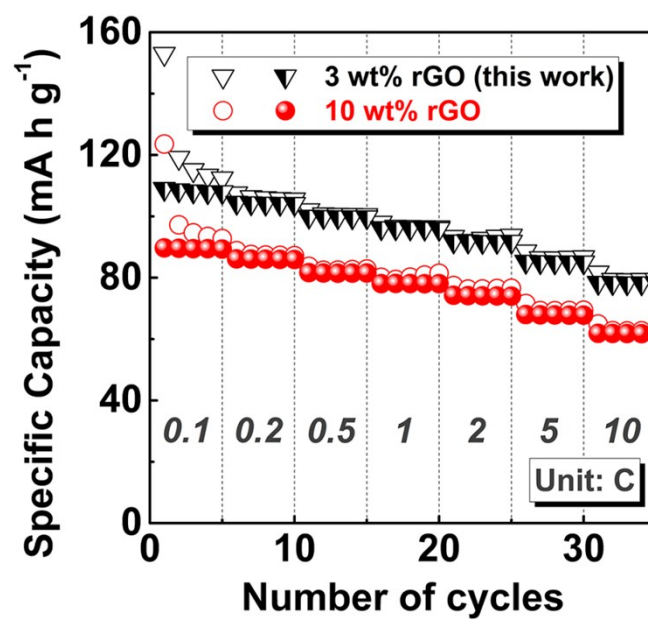

**Fig. S8** Rate performance of NFP-NPs/C/rGO with different amount of rGO in nanocomposite.

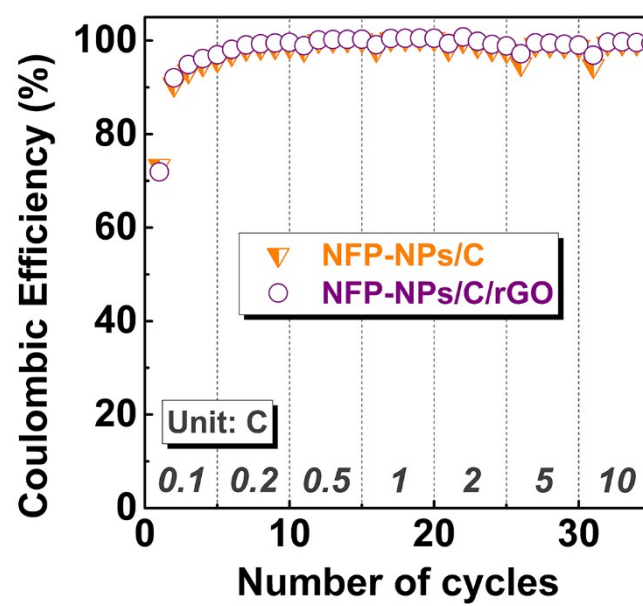

**Fig. S9** Coulombic efficiency of NFP-NPs/C and NFP-NPs/C/rGO.



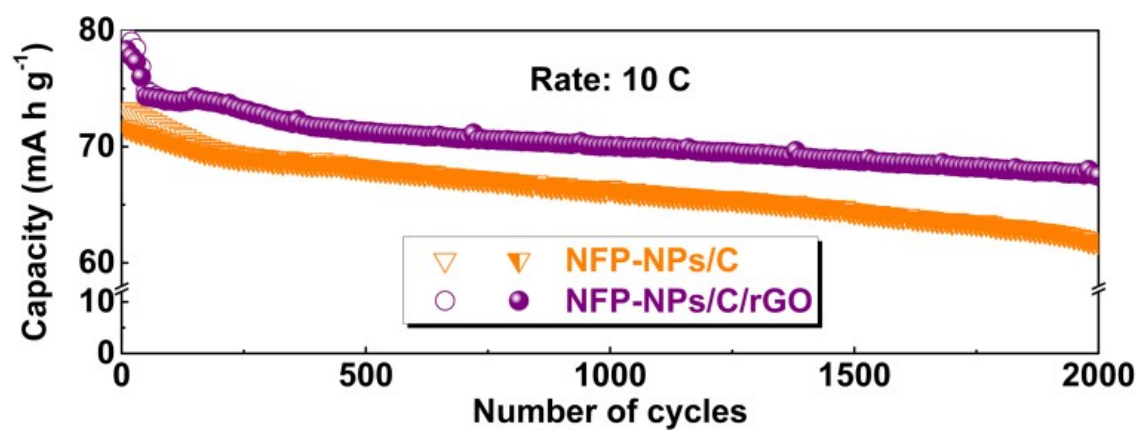

**Fig. S10** Long-term cyclability of NFP-NPs/C and NFP-NPs/C/rGO at 10 C.
